# Supplementary material for: Hemolytic Anemia after Eculizumab in Paroxysmal Nocturnal Hemoglobinuria
Source: Atypon-hosted journal article supplement (doi:10.1056/nejmc1005108), 2010-09-01
Supplement: nejmc1005108_appendix.pdf [file nejmc1005108_appendix.pdf]

## Supplementary Appendix

This appendix has been provided by the authors to give readers additional information about their work.

Supplement to: Berzuini A, Montanelli F, Prati D. Hemolytic anemia after eculizumab in paroxysmal nocturnal hemoglobinuria. *N Engl J Med* 2010;363:993-4.

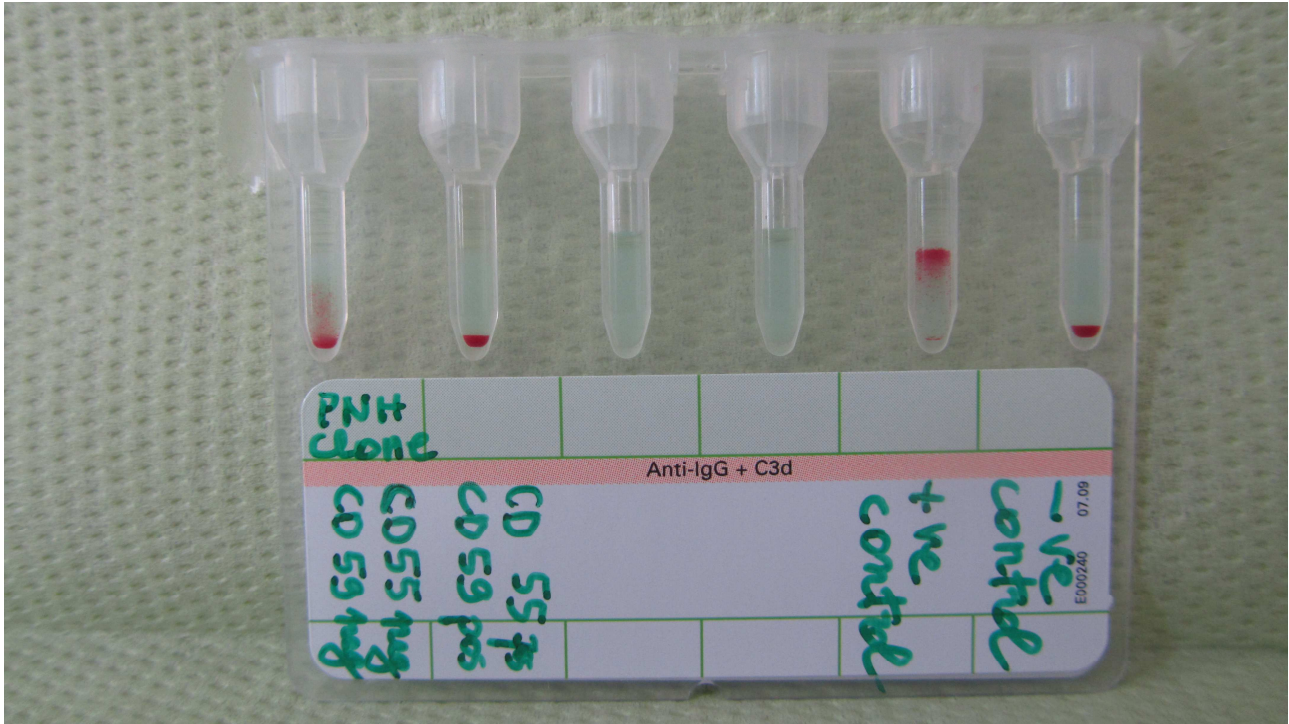

**Supplementary Figure 1.** *Direct Antiglobulin Test of patient samples, after cell sorting for CD55 and CD59.*

Using a FACS-ARIA II cell sorter (Becton Dickinson Biosciences, BD, San José, CA, USA), we obtained two different red cell suspensions selected by the presence or absence of CD55 and CD59. We then performed DAT gel test (Diamed AG, Cressier, Switzerland) on the two sorted red cell fractions and we found that the reactivity was confined to the CD55/CD59 negative red cells (i.e., the PNH clone).
